# Supplementary material for: Aggregation-induced emission (AIE) from poly(1,4-dihydropyridine)s synthesized by Hantzsch polymerization and their specific detection of Fe2+ ions
Source: Royal Society of Chemistry journal article supplement (doi:10.1039/d2py00950a), 2022-01-01
Supplement: d2py00950a1.pdf [file d2py00950a1.pdf]

# Aggregation-Induced Emission (AIE) of poly(*1,4*-dihydropyridine) synthesized by Hantzsch Polymerization and Its Specific Detection for Fe<sup>2+</sup> Ions

Xue Meng<sup>a</sup>, Da Zhang<sup>a</sup>, Ronghui Zhao<sup>a,b</sup>, Zhixia Zhou<sup>a</sup>, Pengfei Zhang<sup>a</sup>, Meng Wang<sup>a</sup>,

Jingyuan Zhao<sup>a</sup>, Huiying Guo<sup>a</sup>, Kuilin Deng<sup>a\*</sup>

<sup>a</sup>College of Chemistry & Environmental Science, Hebei University, Baoding 071002,

China; <sup>b</sup>Affiliated Hospital of Hebei University, Baoding 071002, China

\*Corresponding author: Email: [dengkl\\_hbu@163.com](mailto:dengkl_hbu@163.com)

|                                                                                                                                                |    |
|------------------------------------------------------------------------------------------------------------------------------------------------|----|
| Chemicals and reagents:.....                                                                                                                   | 1  |
| Instruments and Measurements: .....                                                                                                            | 2  |
| Table S1. Different structures of synthesized PDPEs.....                                                                                       | 3  |
| Table S2. Yield, $M_n$ , $PDI$ and quantum yield of PDPEs.....                                                                                 | 3  |
| Figure S1. <sup>1</sup> H NMR spectra of PDPE-TE and PDPE-GE in DMSO <sub>d6</sub> .....                                                       | 4  |
| Figure S2. <sup>1</sup> H NMR spectra of PDPE-TB and PDPE-GB in DMSO <sub>d6</sub> . .....                                                     | 4  |
| Figure S3. <sup>1</sup> H NMR spectra of PDPE-TD in DMSO <sub>d6</sub> and PDPE-GD in CDCl <sub>3</sub> ...4                                   |    |
| Figure S4. <sup>1</sup> H NMR spectra in CDCl <sub>3</sub> and FT-IR spectra of PDPE-GH. ....                                                  | 4  |
| Figure S5. FT-IR spectra of PDPE-TE, PDPE-GE, PDPE-TB, PDPE-GB, PDPE-GD, and PDPE-GE.....                                                      | 5  |
| Figure S6. GPC curves of PDPEs. ....                                                                                                           | 6  |
| Figure S7. DSC curves of PDPE-GO and PDPE-TO. ....                                                                                             | 7  |
| Figure S8. UV absorption of PDPEs (1×10 <sup>-3</sup> M) in DMSO solution.....                                                                 | 7  |
| Figure S9. The particle size of PDPEs (1×10 <sup>-3</sup> M). ....                                                                             | 8  |
| Figure S10. Ratio of chromophore characteristic peaks and alkyl chain characteristic peaks in NMR spectra of PDPEs in DMSO <sub>d6</sub> ..... | 8  |
| Figure S11. Excitation spectra of PDPE-TO at different concentrations.....                                                                     | 9  |
| Figure S12. Effect of different anions on fluorescence of PDPE-TO solution. ....                                                               | 9  |
| Figure S13. Changes of fluorescence intensity with time after adding Fe <sup>2+</sup> ions (0.15 mM) to PDPE-TO.....                           | 10 |

**Chemicals and reagents:**

Ethylenediamine and *1,6*-hexanediamine were purchased from Tianjin Kemiou Chemical Reagent Co., Ltd. Glutaraldehyde and terephthalaldehyde were provided by Aladdin Company (Shanghai, China). Benzaldehyde, *1,4*-diaminobutane, acetylacetone, and *1,5*-glutaraldehyde were purchased from Shanghai McLean Biochemical Co., Ltd. (China). *n*-Butylamine, acetic acid and anhydrous magnesium chloride were provided by Tianjin Guangfu Technology Development Co., Ltd. *1,8*-diaminooctane and *1,10*-diaminodecane were provided by J&K Scientific Technology Co., Ltd. Unless otherwise stated, all chemicals and reagents were obtained from commercial suppliers and used as received without further purification.

**Instruments and Measurements:**

To obtain Fourier transform infrared spectra (FT-IR) of intermediates and PDPEs, we scanned in the wavenumber range of 400-4000  $\text{cm}^{-1}$  using a Bruker Tensor 27 FT-IR spectrometer with a Specac Quest ATR accessory.  $^1\text{H}$  NMRs (400 MHz) of the intermediates and PDPEs were recorded on a Bruker AVANCE III spectrometer at room temperature with tetramethylsilane (TMS) as an internal standard. The molecular weight ( $M_n$ ) and polydispersity index (*PDI*) of prepared PDPEs were determined using a gel permeation chromatography (GPC) system (Agilent 1200). *N,N*-dimethylformamide (DMF) with 0.1% lithium bromide as the elution solvent and polystyrene as the molecular weight standard. The average sizes of aggregated particles in solutions of different ( $V_{\text{DMSO}}/V_{\text{ethyl acetate}}$ ) were measured by dynamic light scattering (DLS) Zetasizer nano-ZSE.

**Table S1. Different structures of synthesized PDPEs.**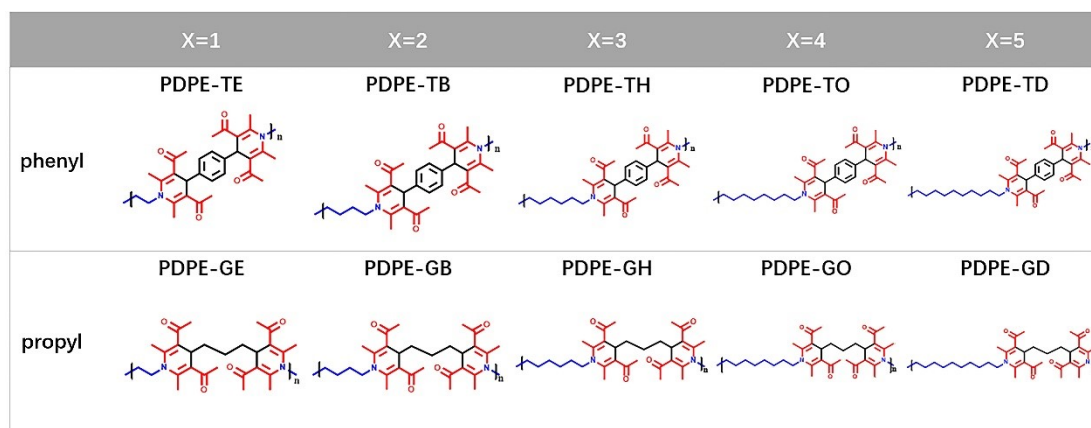**Table S2. Yield,  $M_n$ ,  $PDI$  and quantum yield of PDPEs.**

| Sample    | Yield (%) | $M_n \times 10^3$ g/mol | $PDI$ | Quantum yield (%) |
|-----------|-----------|-------------------------|-------|-------------------|
| PDPE - TB | 56.67     | 6.5                     | 1.52  | 5.11              |
| PDPE - TH | 59.90     | 6.9                     | 1.73  | 6.86              |
| PDPE - TO | 68.18     | 7.4                     | 1.69  | 9.3               |
| PDPE - TD | 64.92     | 8.9                     | 1.56  | 7.6               |
| PDPE - GB | 46.67     | 4.9                     | 1.71  | ×                 |
| PDPE - GH | 45.90     | 5.3                     | 1.53  | ×                 |
| PDPE - GO | 46.18     | 5.7                     | 1.72  | ×                 |
| PDPE - GD | 44.73     | 6.1                     | 1.68  | ×                 |

(× means the relative yield was too low.)

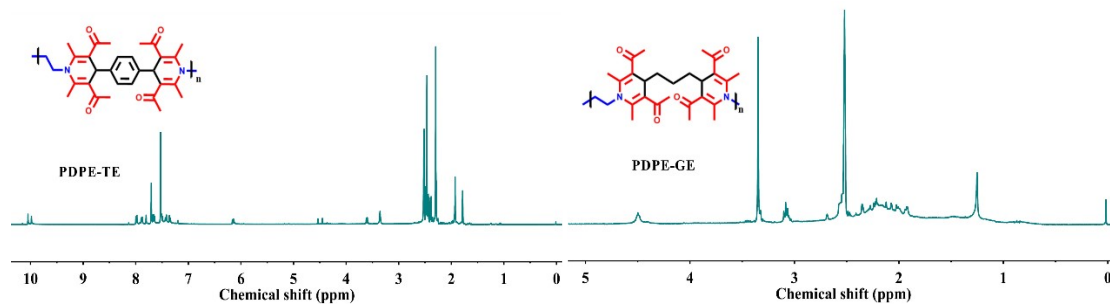

**Figure S1.**  $^1\text{H}$  NMR spectra of PDPE-TE and PDPE-GE in  $\text{DMSO-}d_6$ .

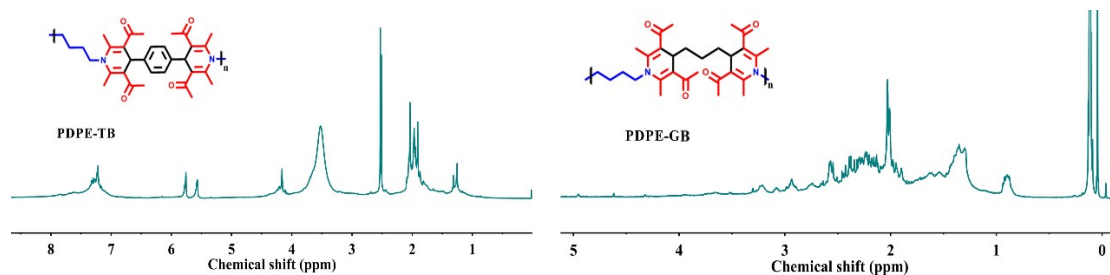

**Figure S2.**  $^1\text{H}$  NMR spectra of PDPE-TB and PDPE-GB in  $\text{DMSO-}d_6$ .

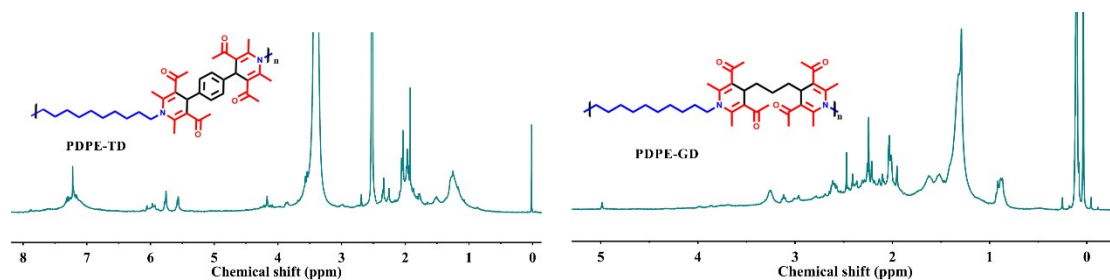

**Figure S3.**  $^1\text{H}$  NMR spectra of PDPE-TD in  $\text{DMSO-}d_6$  and PDPE-GD in  $\text{CDCl}_3$ .

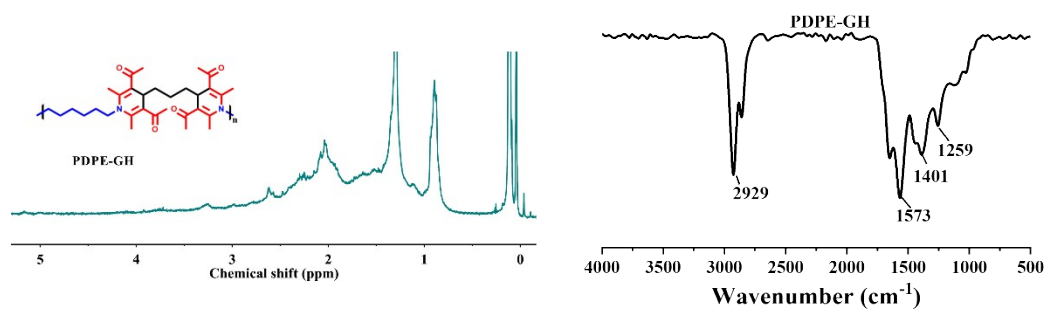

**Figure S4.**  $^1\text{H}$  NMR spectra in  $\text{CDCl}_3$  and FT-IR spectra of PDPE-GH.

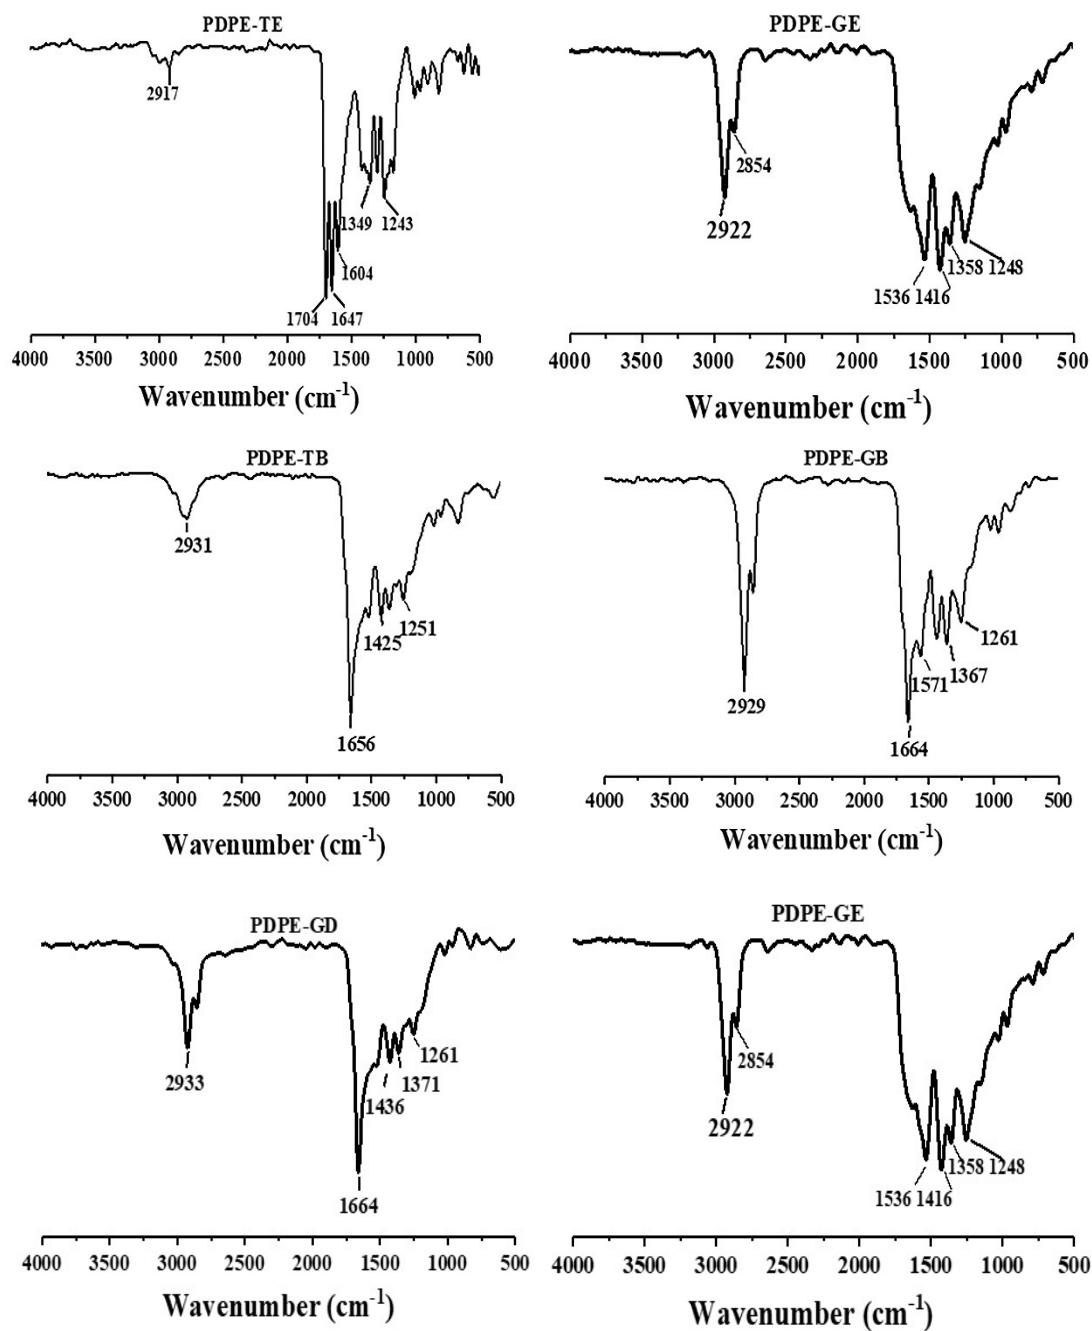

**Figure S5. FT-IR spectra of PDPE-TE, PDPE-GE, PDPE-TB, PDPE-GB, PDPE-GD, and PDPE-GE.**

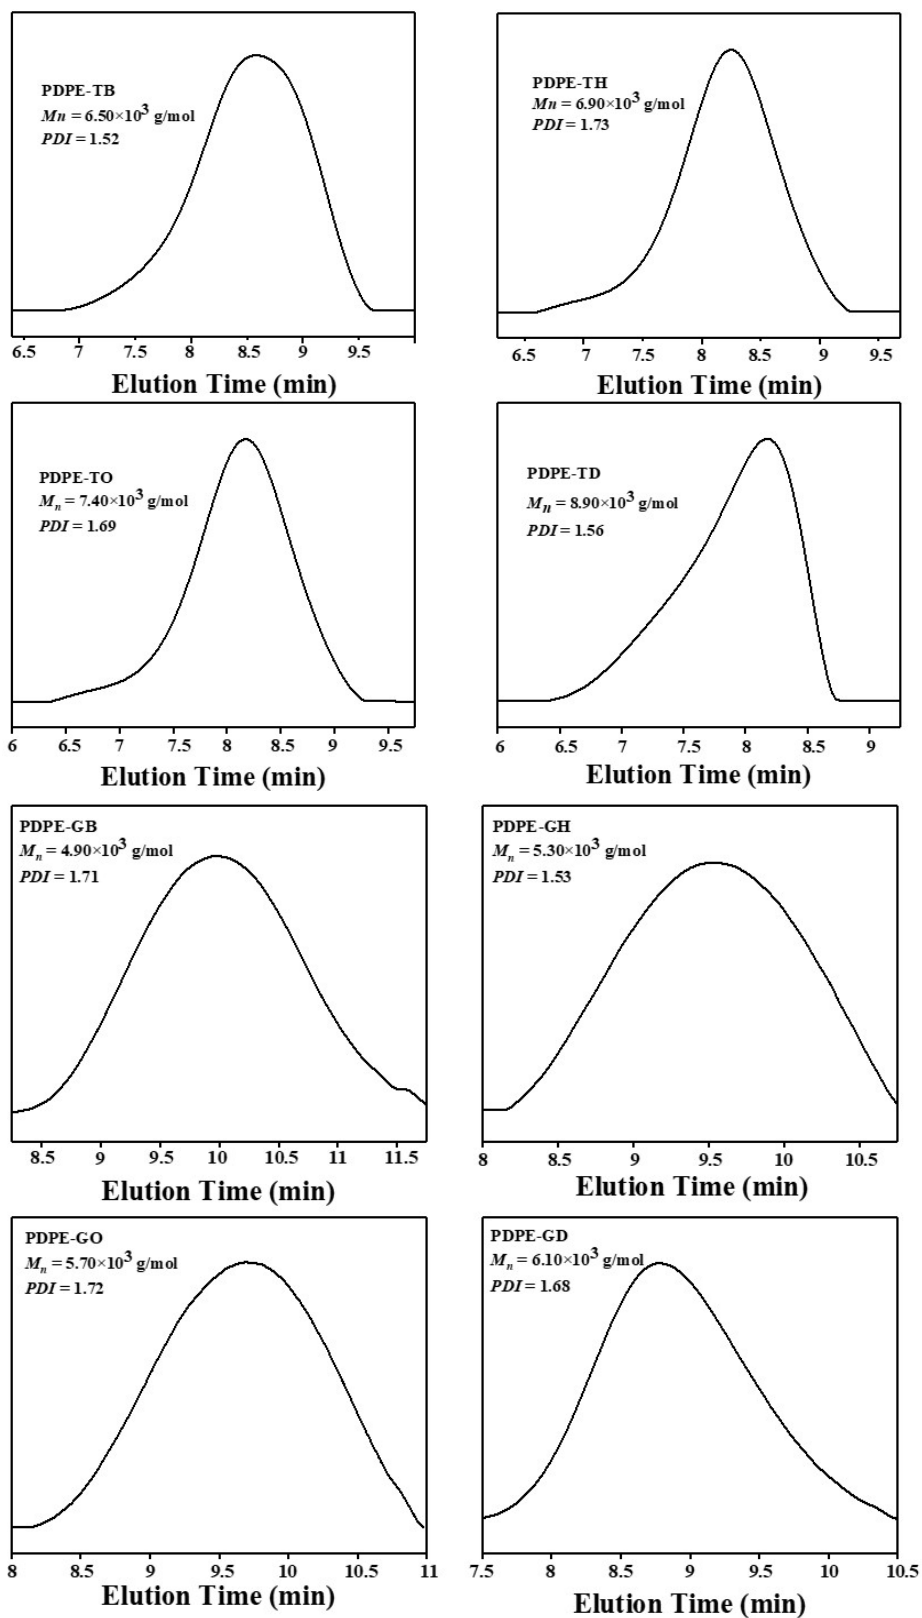

Figure S6. GPC curves of PDPEs.

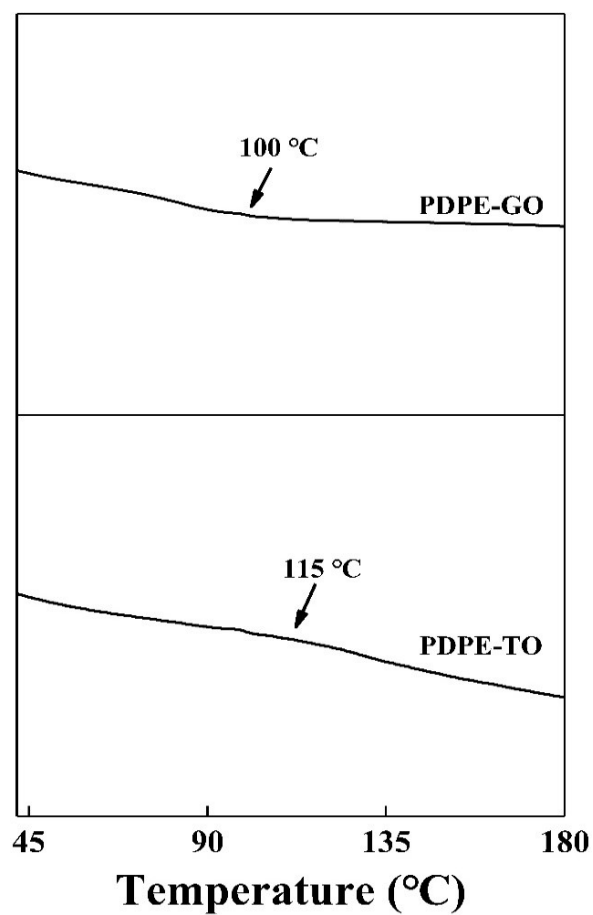

Figure S7. DSC curves of PDPE-GO and PDPE-TO.

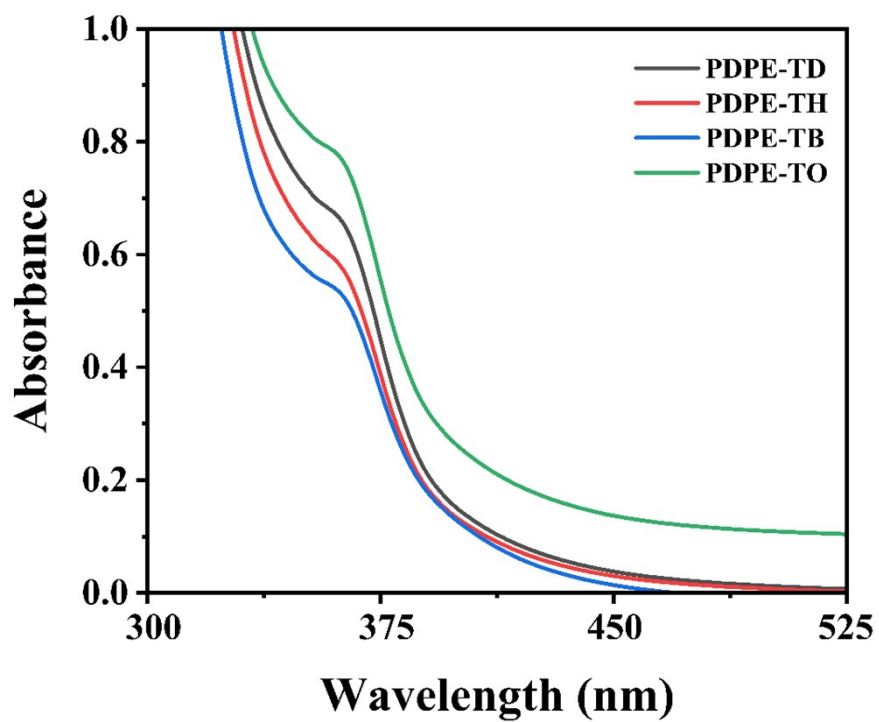

Figure S8. UV absorption of PDPEs ( $1 \times 10^{-3}$  M) in DMSO solution.

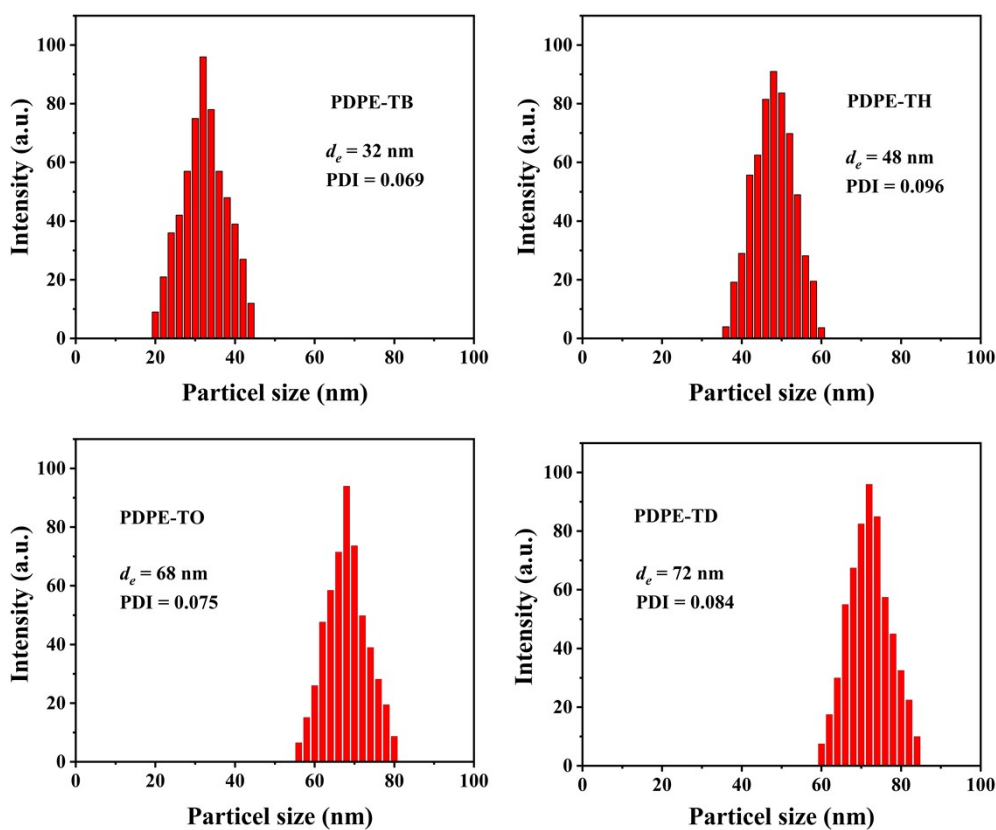

Figure S9. The particle size of PDPEs ( $1 \times 10^{-3}$  M).

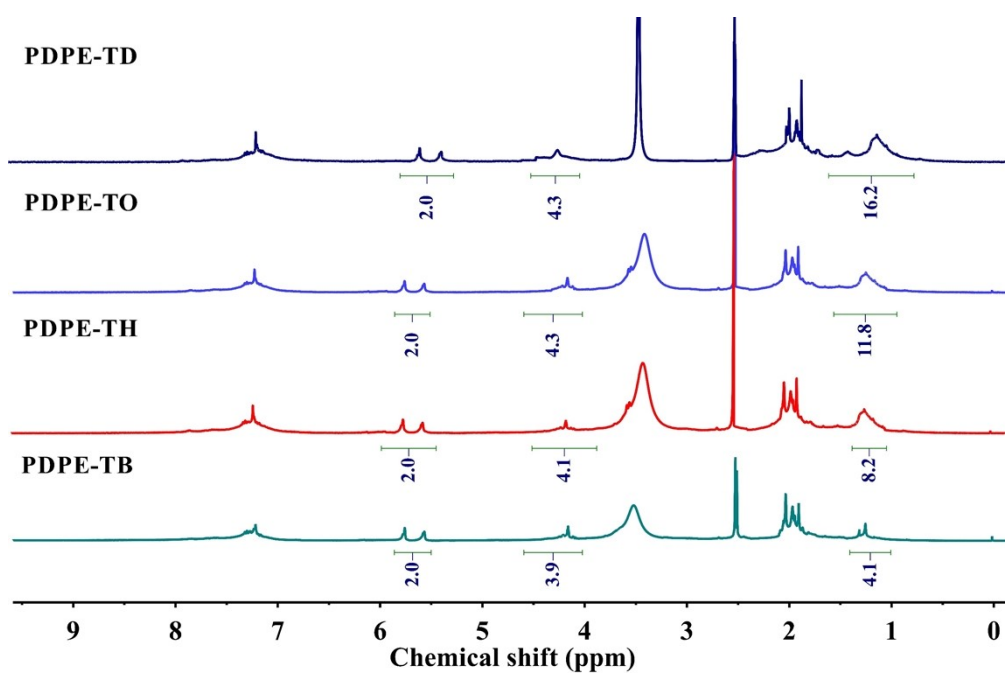

Figure S10. Ratio of chromophore characteristic peaks and alkyl chain characteristic peaks in NMR spectra of PDPEs in  $\text{DMSO}_{d6}$ .



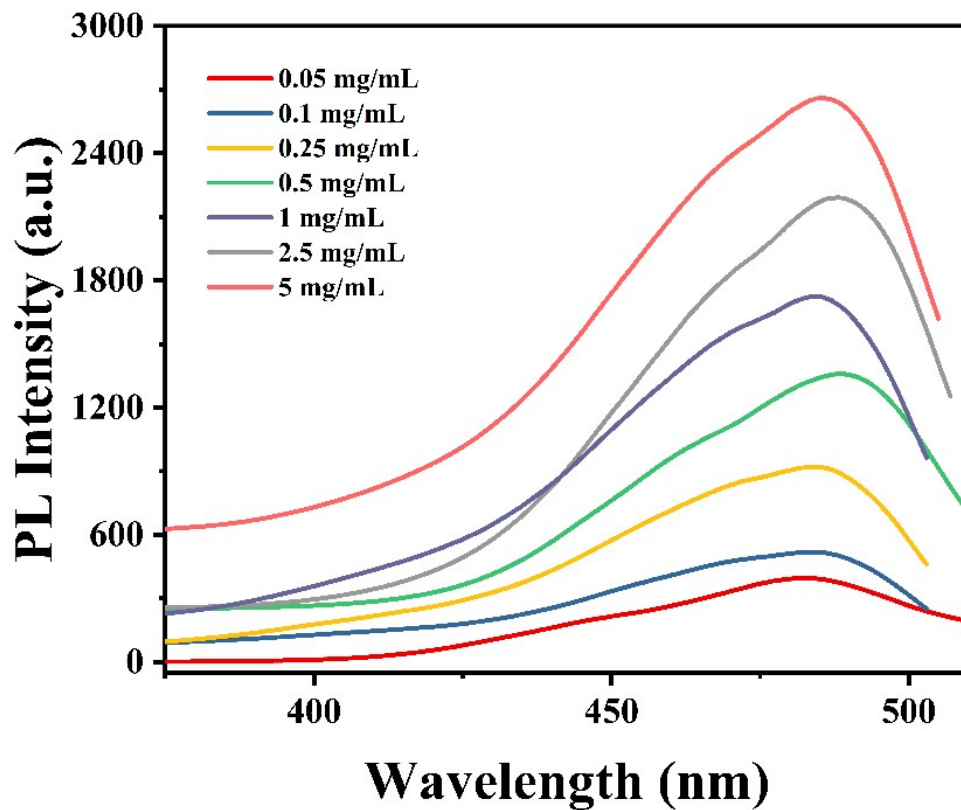

Figure S11. Excitation spectra of PDPE-TO at different concentrations.

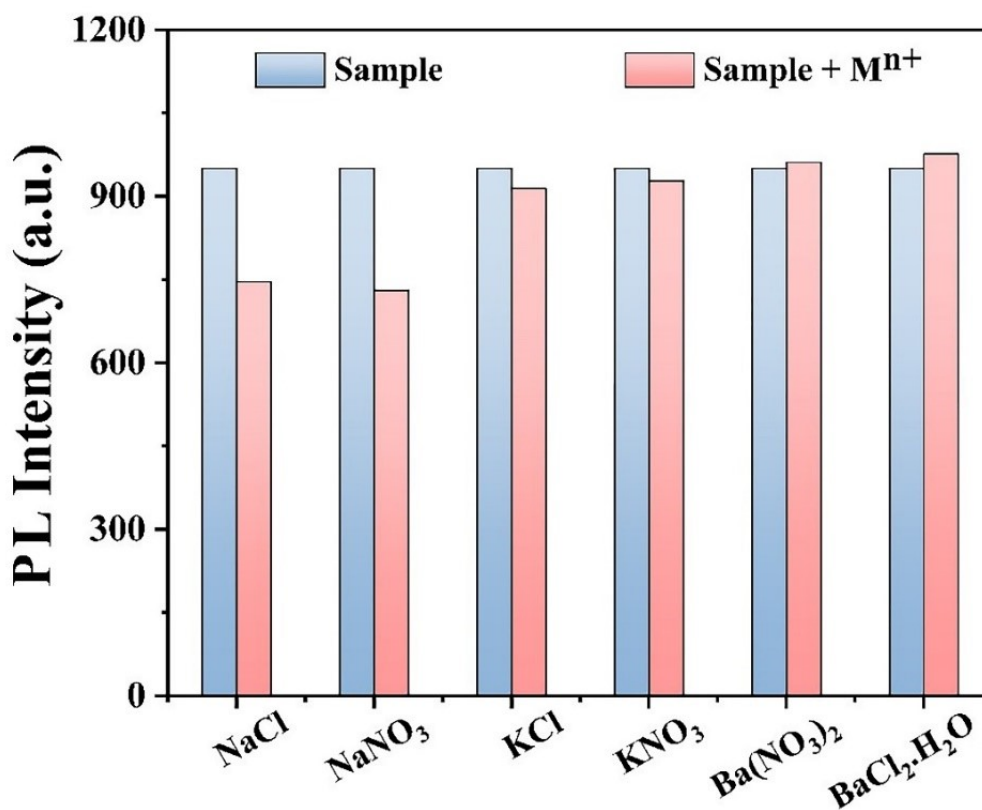

Figure S12. Effect of different anions on fluorescence of PDPE-TO solution.

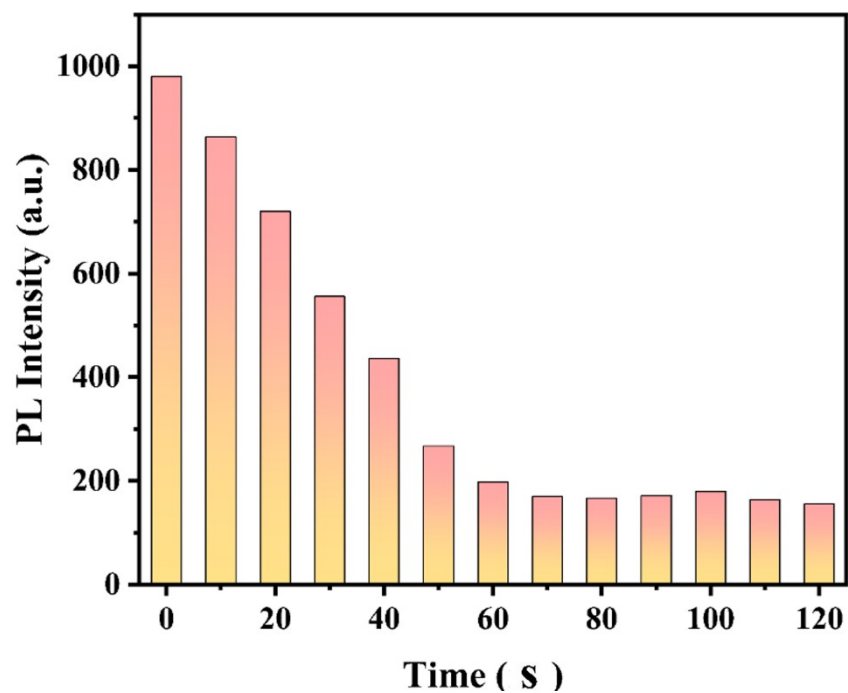

**Figure S13. Changes of fluorescence intensity with time after adding Fe<sup>2+</sup> ions (0.15 mM) to PDPE-TO.**
